# Supplementary material
Source: PubMed Central journal article supplement (PMC6812505)
Supplement: NIHMS1516396-supplement-1.pdf [file NIHMS1516396-supplement-1.pdf]

**Figure S1.** Kaplan-Meier survival estimates for freedom from ASVD-death, stratified by quintiles of each inflammatory marker. Log-rank chi-square p-values: **A.** hs-CRP:  $p < 0.001$ . **B.** Fibrinogen:  $p < 0.001$ . **C.** serum albumin:  $p < 0.001$ . **D.** IL-1 $\beta$ :  $p < 0.001$ . **E.** IL-1RA:  $p = 0.04$ . **F.** IL-6:  $p < 0.001$ . **G.** TGF- $\beta$ :  $p = 0.03$ . **H.** TNF- $\alpha$ :  $p < 0.001$ .
