# Supplementary material
Source: PubMed Central journal article supplement (PMC6812505)

**Figure S2.** Cumulative incidence functions for time to first incident ASVD event, with death as a competing risk, stratified by biomarker quintile. P-value is for Gray's chi-square test for equality of cumulative incidence functions over 7 years of follow-up. The CIS retains a stepwise risk function as quintile increases. This is less true for the individual biomarkers.  
**A.** hs-CRP:  $p=0.02$ . **B.** Fibrinogen:  $p=0.006$ . **C.** Serum Albumin:  $p<0.001$ , **D.** Interleukin-6:  $p=0.01$ . **E.** TNF- $\alpha$ :  $p=0.009$ , **F.** Composite Inflammation Score:  $p<0.001$ .

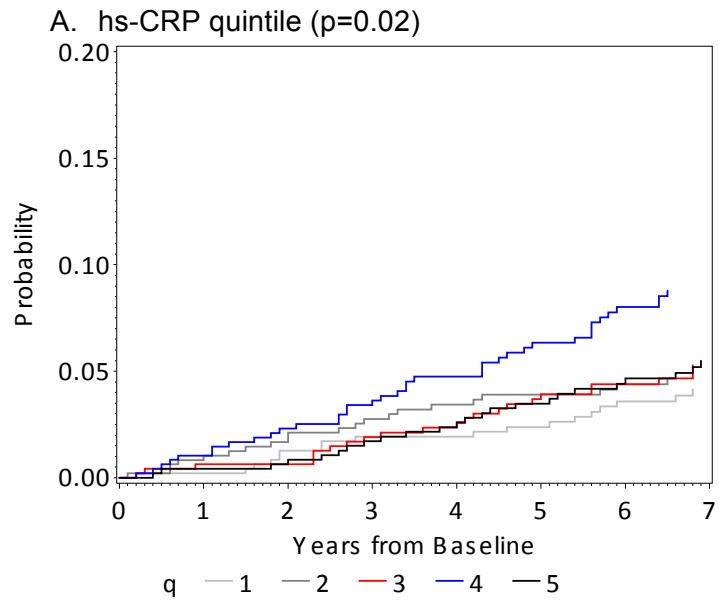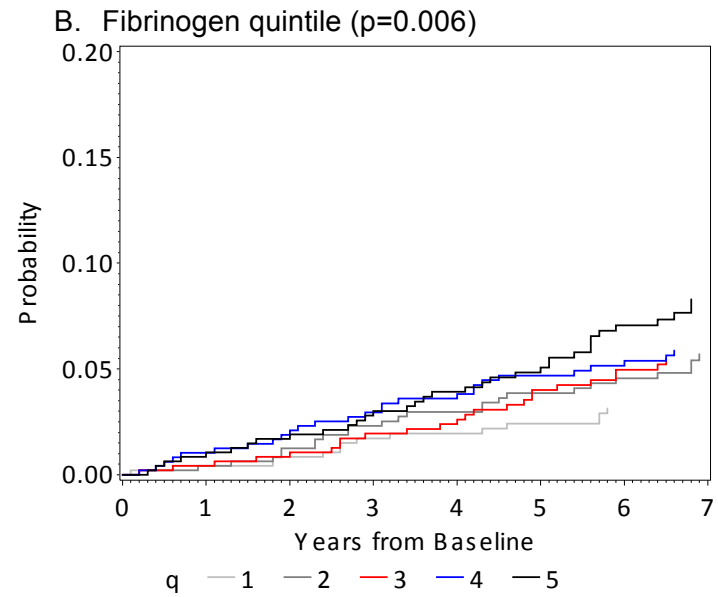

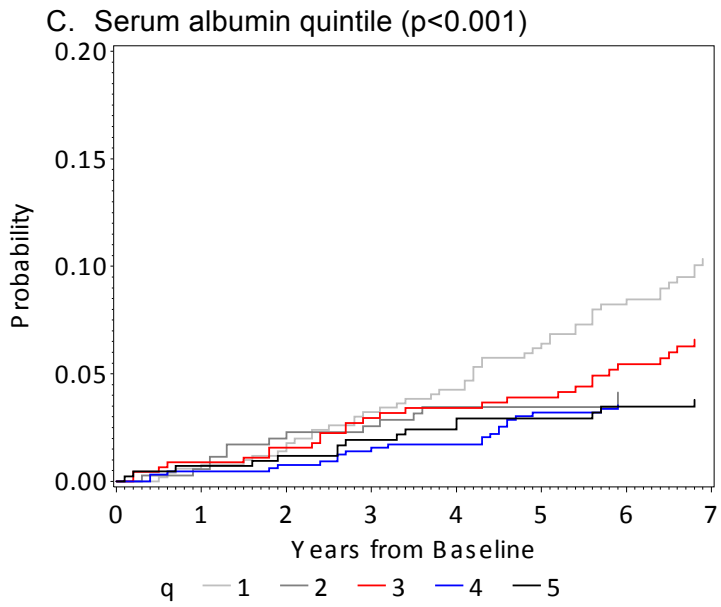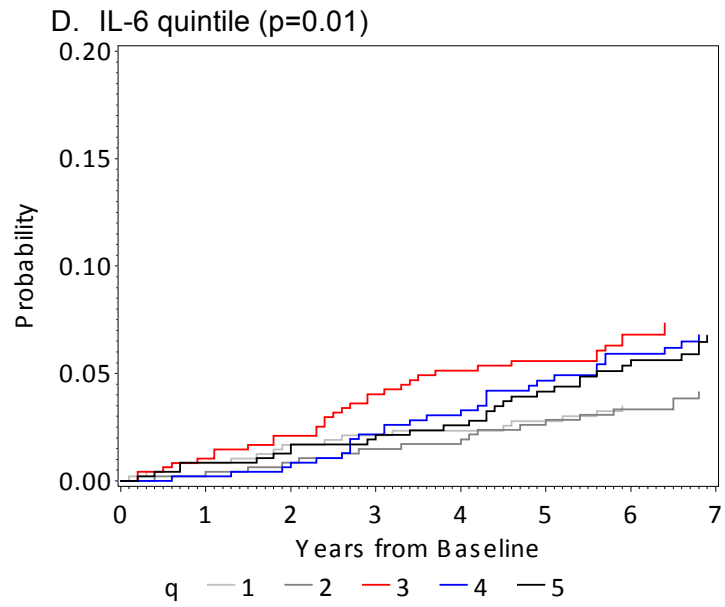

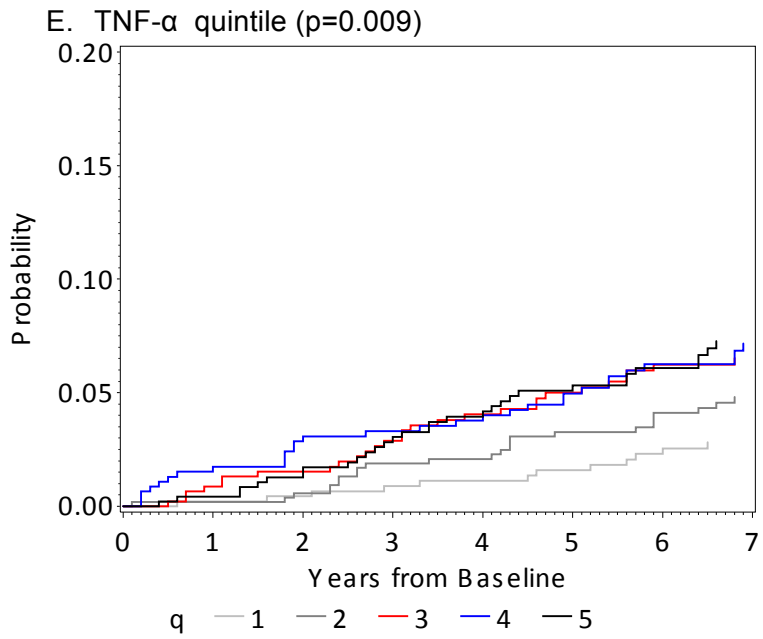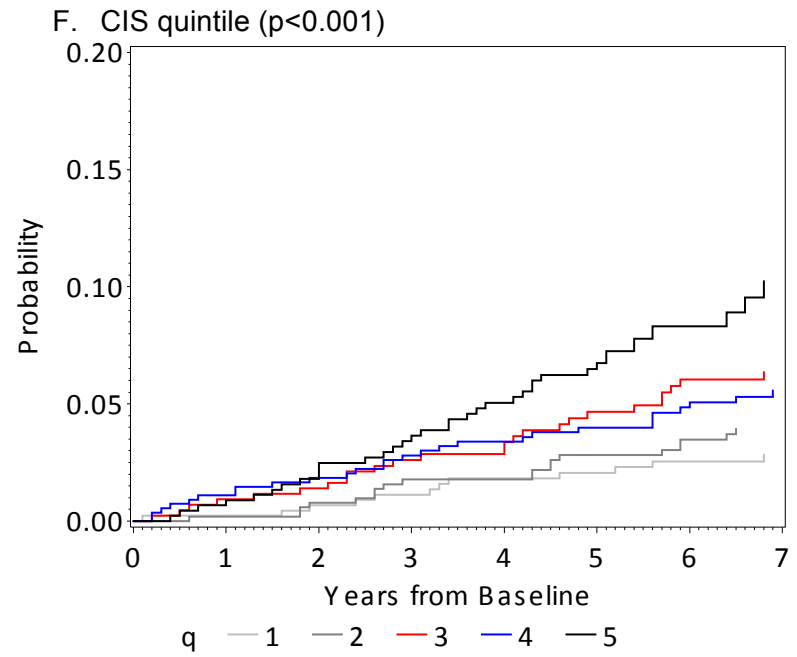

Supplement: NIHMS1516396-supplement-2.pdf [file NIHMS1516396-supplement-2.pdf]
