# Supplementary material
Source: PubMed Central journal article supplement (PMC6812505)

**Figure S3A.** Interactions for inflammatory biomarkers by level of estimated glomerular filtration rate (eGFR), adjusted for log of albuminuria (UACR), and log of Pooled Cohort Equation Probability estimate. Serum albumin had a slightly stronger association with the composite outcome when baseline eGFR was  $\geq 30$  ml/min/1.73m<sup>2</sup> than when  $<30$  ml/min/1.73m<sup>2</sup>. The other markers did not have interactions with eGFR.

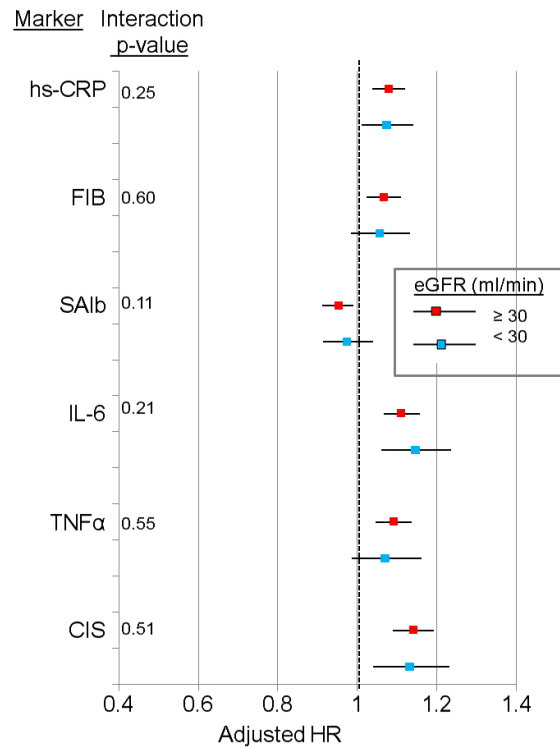

**Figure S3B.** Interactions for inflammatory biomarkers by level of albuminuria (UACR), adjusted for eGFR and log of Pooled Cohort Equation Probability estimate. Serum albumin had a slightly stronger association with the composite outcome when baseline UACR was  $\geq 30$  mg/g than when  $<30$  mg/g. The other markers did not have interactions with UACR.

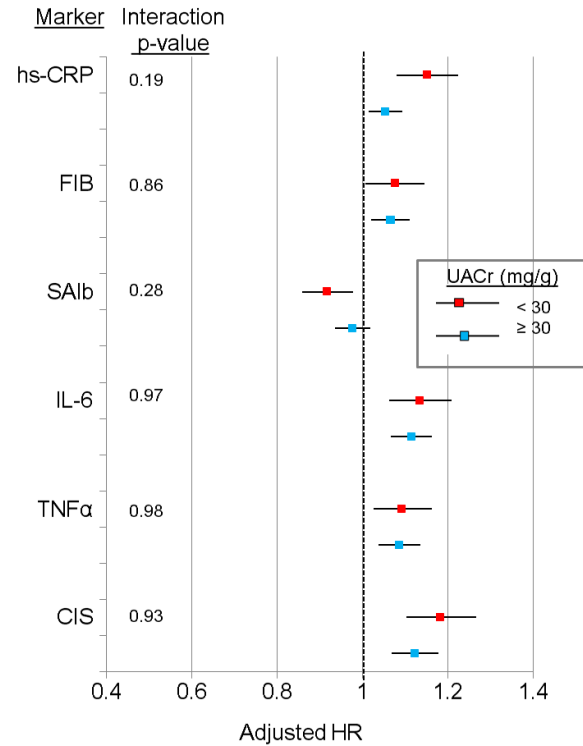

Supplement: NIHMS1516396-supplement-3.pdf [file NIHMS1516396-supplement-3.pdf]
