# Supplementary material
Source: PubMed Central journal article supplement (PMC6812505)
Supplement: NIHMS1516396-supplement-4.pdf [file NIHMS1516396-supplement-4.pdf]

**Table S1.** Univariable odds ratios (95% CI) by quartile, for five inflammatory markers predicting incident CVD-death during follow-up. Each marker has a monotonic increase in risk with increasing quartile (except serum albumin, which is reversed).

| Marker        | Quartile 2       | Quartile 3       | Quartile 4       |
|---------------|------------------|------------------|------------------|
| hs-CRP        | 1.09 (0.80-1.48) | 1.73 (1.30-2.31) | 1.95 (1.46-2.61) |
| TNF- $\alpha$ | 1.50 (1.10-2.05) | 2.60 (1.93-3.52) | 3.00 (2.24-4.02) |
| IL-6          | 1.90 (1.40-2.61) | 2.52 (1.85-3.45) | 4.17 (3.08-5.65) |
| Serum albumin | 0.50 (0.38-0.66) | 0.45 (0.34-0.59) | 0.38 (0.28-0.51) |
| Fibrinogen    | 1.12 (0.82-1.54) | 1.92 (1.42-2.58) | 3.14 (2.34-4.20) |

hs-CRP= High sensitive C-Reactive Protein, IL= Interleukin and TNF- $\alpha$ = Tumor necrosis factor- $\alpha$
