# Supplementary material
Source: PubMed Central journal article supplement (PMC6812505)
Supplement: NIHMS1516396-supplement-5.pdf [file NIHMS1516396-supplement-5.pdf]

**Table S2.** Associations of inflammatory markers with individual outcomes, using separate Cox proportional hazards models for each marker. Multivariable models are adjusted for Ln(PCEP), Ln(UACR), and eGFR. Each inflammatory biomarker is coded into deciles, which is used as a continuous variable. Outcomes: A. Death, B. Peripheral arterial disease, C. Myocardial Infarction, D. Stroke. E. Composite of MI, Stroke and PAD

**A. Death**

| Marker Decile | Univariable model |        | Multivariable model |        |
|---------------|-------------------|--------|---------------------|--------|
|               | HR (95% CI)       | p      | HR (95% CI)         | P      |
| IL-1 $\beta$  | 1.07 (1.02-1.11)  | 0.002  | 1.03 (0.99-1.07)    | 0.2    |
| IL-1RA        | 1.06 (1.02-1.10)  | 0.002  | 1.04 (1.00-1.08)    | 0.07   |
| IL-6          | 1.23 (1.19-1.29)  | <0.001 | 1.16 (1.11-1.21)    | <0.001 |
| TGF- $\beta$  | 1.07 (1.03-1.11)  | <0.001 | 1.05 (1.01-1.09)    | 0.01   |
| TNF- $\alpha$ | 1.18 (1.14-1.23)  | <0.001 | 1.10 (1.06-1.16)    | <0.001 |
| hs-CRP        | 1.11 (1.07-1.15)  | <0.001 | 1.09 (1.05-1.13)    | <0.001 |
| Fibrinogen    | 1.17 (1.13-1.22)  | <0.001 | 1.07 (1.03-1.12)    | 0.002  |
| Serum albumin | 0.91 (0.78-0.94)  | <0.001 | 0.97 (0.93-1.01)    | 0.13   |
| CIS           | 1.27 (1.22-1.33)  | <0.001 | 1.17 (1.11-1.23)    | <0.001 |

**B. Peripheral Arterial Disease**

| Marker Decile | Univariable model |        | Multivariable model |       |
|---------------|-------------------|--------|---------------------|-------|
|               | HR (95% CI)       | p      | HR (95% CI)         | P     |
| IL-1 $\beta$  | 1.04 (0.95-1.14)  | 0.4    | 0.98 (0.89-1.07)    | 0.6   |
| IL-1RA        | 1.00 (0.92-1.09)  | 0.1    | 0.96 (0.88-1.05)    | 0.3   |
| IL-6          | 1.20 (1.09-1.31)  | <0.001 | 1.10 (0.99-1.21)    | 0.07  |
| TGF- $\beta$  | 1.03 (0.94 -1.13) | 0.50   | 1.00 (0.92-1.10)    | 0.9   |
| TNF- $\alpha$ | 1.23 (1.12-1.35)  | <0.001 | 1.09 (0.98-1.21)    | 0.1   |
| hs-CRP        | 1.04 (0.95-1.13)  | 0.43   | 1.02 (0.94-1.12)    | 0.6   |
| Fibrinogen    | 1.24 (1.13-1.37)  | <0.001 | 1.08 (0.97-1.19)    | 0.2   |
| Serum albumin | 0.80 (0.73-0.88)  | <0.001 | 0.90 (0.81-1.00)    | <0.05 |
| CIS           | 1.37 (1.24-1.53)  | <0.001 | 1.18 (1.05-1.33)    | 0.007 |

**C. Myocardial Infarction**

| Marker Decile | Univariable model |        | Multivariable model |      |
|---------------|-------------------|--------|---------------------|------|
|               | HR (95% CI)       | p      | HR (95% CI)         | P    |
| IL-1 $\beta$  | 1.02 (0.94-1.10)  | 0.6    | 0.99 (0.91-1.07)    | 0.7  |
| IL-1RA        | 1.02 (0.95-1.10)  | 0.6    | 1.00 (0.93-1.07)    | 0.9  |
| IL-6          | 1.16 (1.07-1.25)  | <0.001 | 1.08 (1.00-1.17)    | 0.06 |
| TGF- $\beta$  | 1.01 (0.94-1.09)  | 0.8    | 0.99 (0.92-1.07)    | 0.9  |
| TNF- $\alpha$ | 1.10 (1.02-1.18)  | 0.01   | 1.02 (0.94-1.11)    | 0.6  |
| hs-CRP        | 1.07 (1.00-1.15)  | 0.07   | 1.05 (0.98-1.13)    | 0.2  |
| Fibrinogen    | 1.16 (1.07-1.25)  | <0.001 | 1.06 (0.98-1.16)    | 0.1  |
| Serum albumin | 0.88 (0.82-0.95)  | 0.001  | 0.94 (0.87-1.02)    | 0.1  |
| CIS           | 1.22 (1.13-1.32)  | <0.001 | 1.12 (1.02-1.23)    | 0.02 |

**D. Stroke**

| Marker Decile | Univariable model |       | Multivariable model |     |
|---------------|-------------------|-------|---------------------|-----|
|               | HR (95% CI)       | p     | HR (95% CI)         | P   |
| IL-1 $\beta$  | 1.03 (0.93-1.15)  | 0.5   | 0.99 (0.89-1.11)    | 0.9 |
| IL-1RA        | 0.98 (0.89-1.09)  | 0.8   | 0.96 (0.87-1.06)    | 0.4 |
| IL-6          | 1.14 (1.03-1.26)  | 0.01  | 1.06 (0.95-1.18)    | 0.3 |
| TGF- $\beta$  | 1.03 (0.93-1.14)  | 0.6   | 1.01 (0.91-1.12)    | 0.9 |
| TNF- $\alpha$ | 1.12 (1.01-1.24)  | 0.03  | 1.03 (0.92-1.16)    | 0.6 |
| hs-CRP        | 1.10 (0.99-1.21)  | 0.07  | 1.08 (0.98-1.20)    | 0.1 |
| Fibrinogen    | 1.19 (1.07-1.32)  | 0.001 | 1.09 (0.97-1.22)    | 0.1 |
| Serum albumin | 0.94 (0.85-1.04)  | 0.2   | 1.03 (0.92-1.15)    | 0.6 |
| CIS           | 1.18 (1.06-1.31)  | 0.002 | 1.05 (0.93-1.19)    | 0.4 |

**E. Composite of MI, Stroke and PAD**

| Marker Decile | Univariable model |         | Multivariable model |      |
|---------------|-------------------|---------|---------------------|------|
|               | HR (95% CI)       | p       | HR (95% CI)         | P    |
| IL-1 $\beta$  | 1.03 (0.97-1.09)  | 0.37    | 0.99 (0.93-1.05)    | 0.70 |
| IL-1RA        | 0.99 (0.94-1.05)  | 0.76    | 0.96 (0.91-1.02)    | 0.19 |
| IL-6          | 1.12 (1.06-1.19)  | 0.001   | 1.06 (0.99-1.12)    | 0.09 |
| TGF- $\beta$  | 1.00 (0.84-1.05)  | 0.86    | 0.98 (0.93-1.04)    | 0.54 |
| TNF- $\alpha$ | 1.12 (1.06-1.19)  | <0.001  | 1.05 (0.98-1.12)    | 0.14 |
| hs-CRP        | 1.09 (1.02-1.15)  | 0.006   | 1.07 (1.01-1.13)    | 0.02 |
| Fibrinogen    | 1.15 (1.08-1.22)  | <0.001  | 1.06 (1.00-1.13)    | 0.07 |
| Serum albumin | 0.89 (0.84-0.94)  | <0.0001 | 0.95 (0.90-1.02)    | 0.13 |
| CIS           | 1.19 (1.12-1.26)  | <0.001  | 1.09 (1.01-1.17)    | 0.02 |
