# Supplementary material
Source: PubMed Central journal article supplement (PMC6812505)
Supplement: NIHMS1516396-supplement-6.pdf [file NIHMS1516396-supplement-6.pdf]

**Table S3.** Cut points for calculating inflammatory marker deciles. These are used in calculating the CIS.

| Decile | Marker          |                          |                     |                         |
|--------|-----------------|--------------------------|---------------------|-------------------------|
|        | IL-6<br>(pg/mL) | TNF- $\alpha$<br>(pg/mL) | Fibrinogen<br>(g/L) | Serum albumin<br>(g/dL) |
| 1      | <.662           | < 0.9                    | < 2.81              | < 3.4                   |
| 2      | .662 - .909     | 1.0 – 1.2                | 2.81 – 3.175        | 3.4 – 3.6               |
| 3      | .910 – 1.148    | 1.3 – 1.5                | 3.1751 – 3.4359     | 3.7                     |
| 4      | 1.149 – 1.395   | 1.6 – 1.8                | 3.4360 – 3.6952     | 3.8                     |
| 5      | 1.396 – 1.691   | 1.9 – 2.0                | 3.6953 – 3.9466     | 3.9                     |
| 6      | 1.692 – 2.011   | 2.1 – 2.4                | 3.9467 – 4.2137     | 4.0                     |
| 7      | 2.012 – 2.476   | 2.5 – 2.8                | 4.2138 – 4.4953     | 4.1                     |
| 8      | 2.477 – 3.212   | 2.9 -3.4                 | 4.4954 – 4.8959     | 4.2 – 4.3               |
| 9      | 3.213 – 4.793   | 3.5 – 4.6                | 4.8960 – 5.5153     | 4.4                     |
| 10     | >4.793          | > 4.6                    | >5.5153             | >4.4                    |
